# Supplementary material
Source: Springer Nature journal article supplement (https://www.springermedizin.de/resource/supplementary/12943_2014_1306_MOESM1_ESM.pdf/9552670)

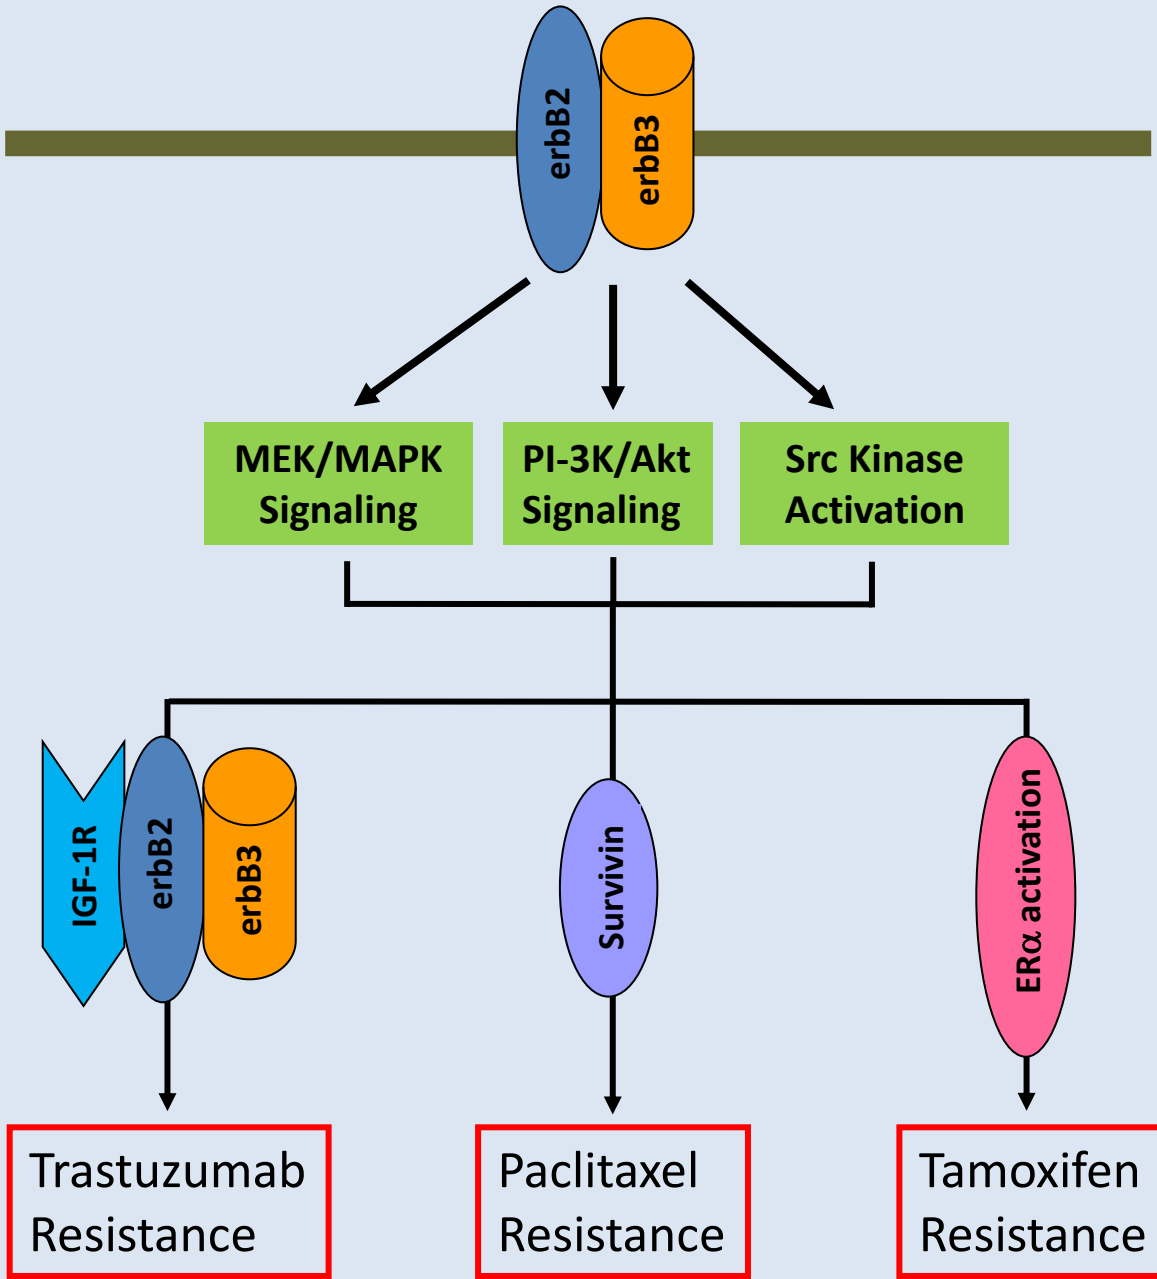

**Luminal B and ErbB2+**

(Huang : *Cancer Res* 2010)

**ErbB2+**

(Wang: *Oncogene* 2010)

**Luminal B**

(Liu: *Int J Cancer* 2007)

Supplement: MOESM1 [file 9552670]
